# Supplementary material for: Increased OXPHOS activity precedes rise in glycolytic rate in H-RasV12/E1A transformed fibroblasts that develop a Warburg phenotype
Source: PubMed Central journal article supplement (PMC2734543; doi:10.1186/1476-4598-8-54), 2009-07-31

# Figure S1

## A primary and immortalized cells

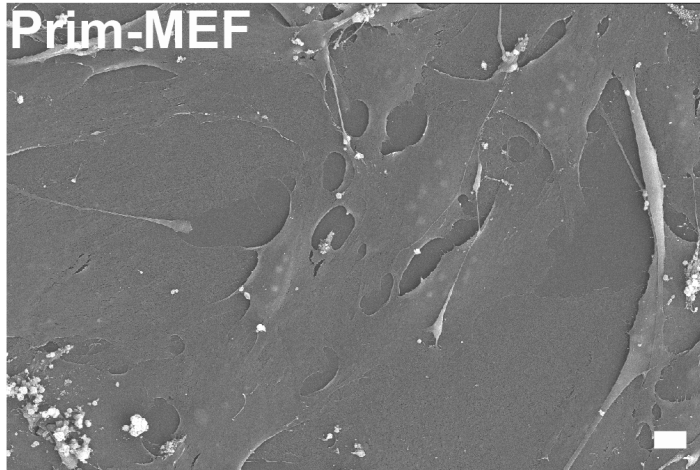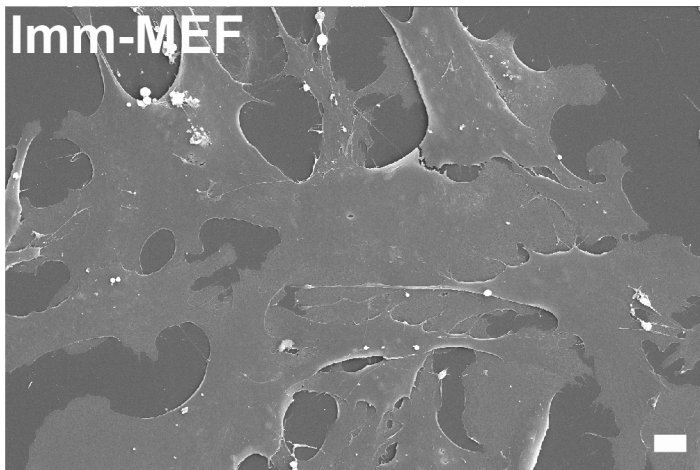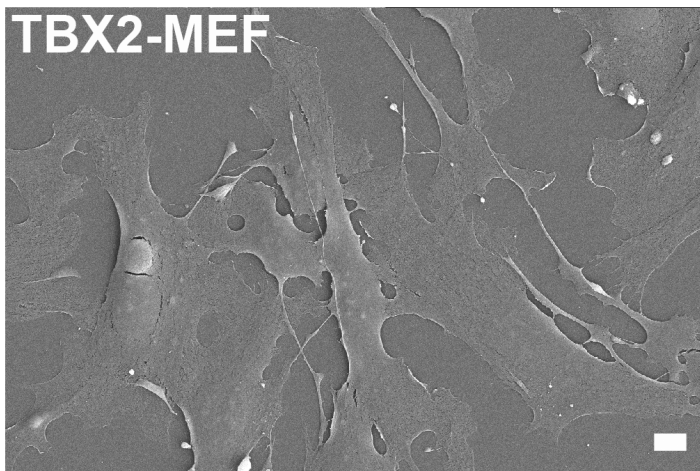

## B H-RasV12/E1A-transformed cells

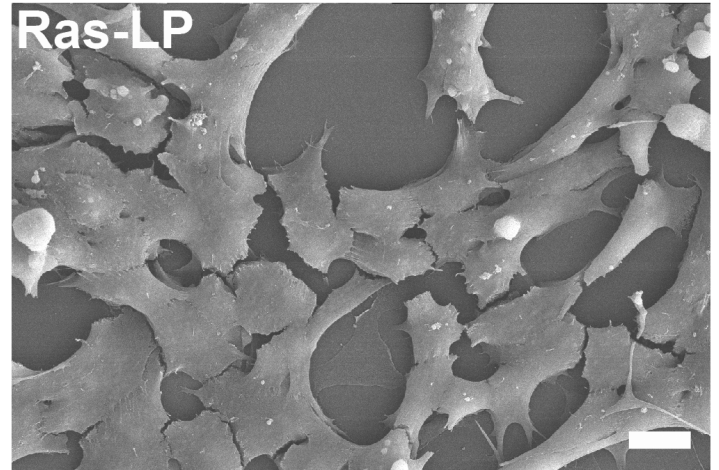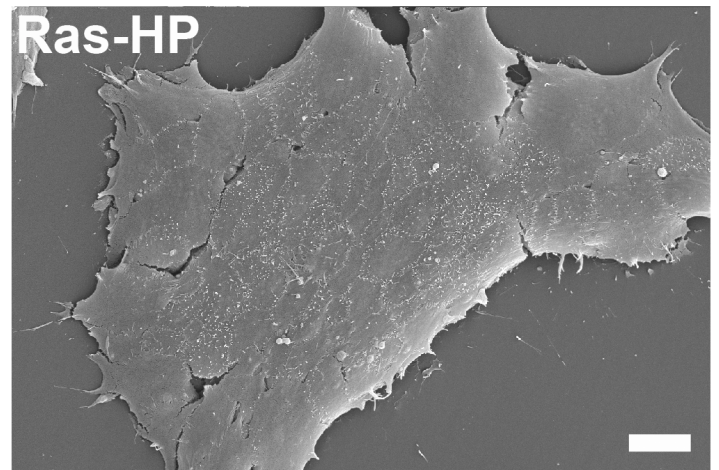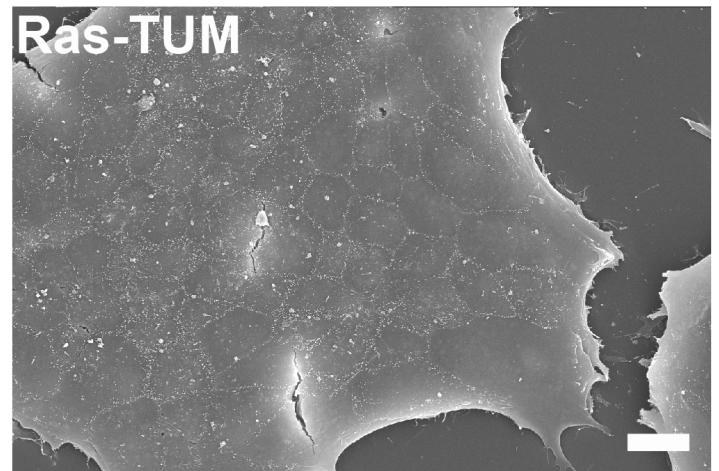

# Figure S2

## A

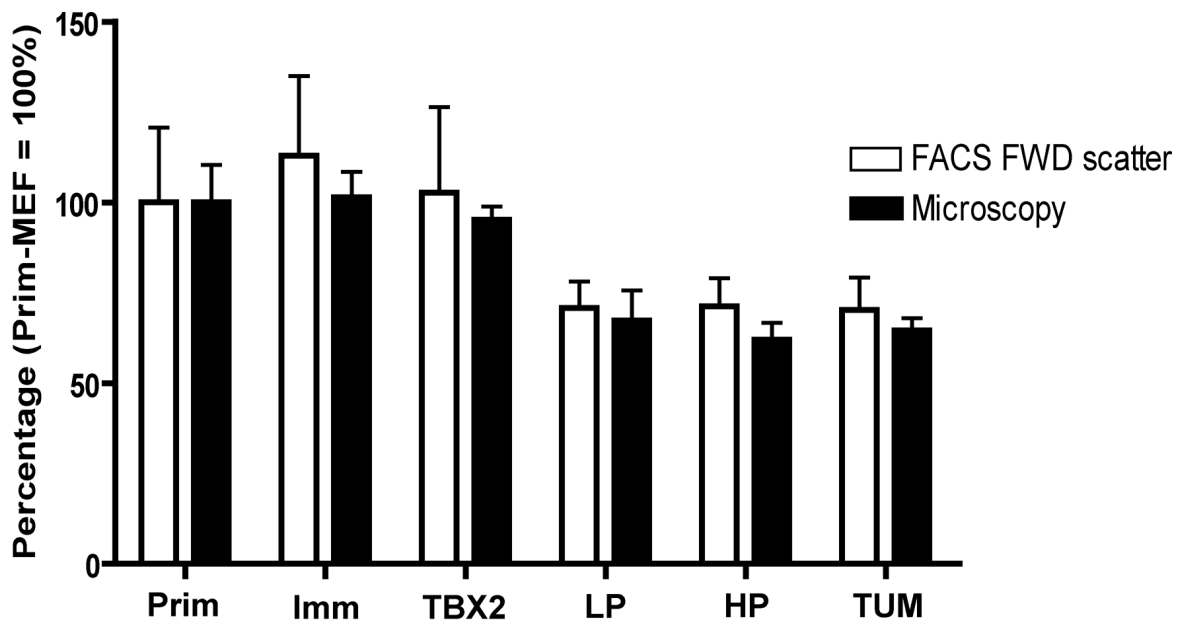

## B

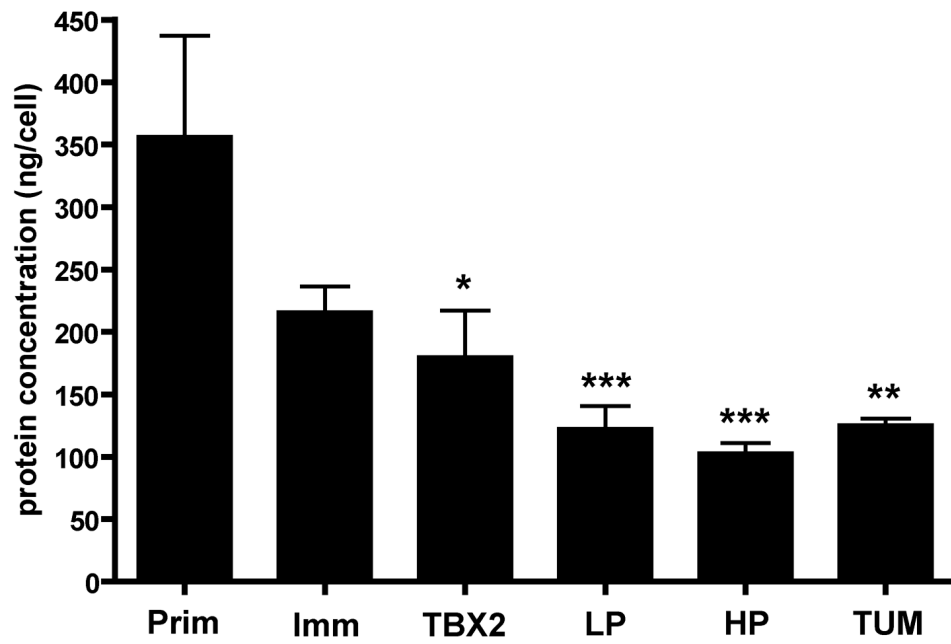

## C

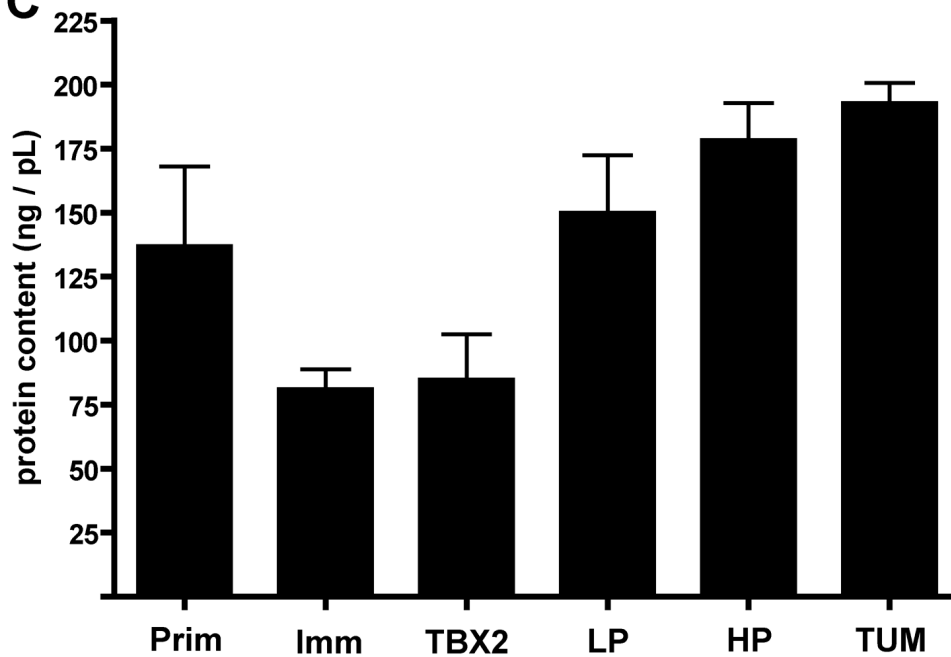

Figure S3

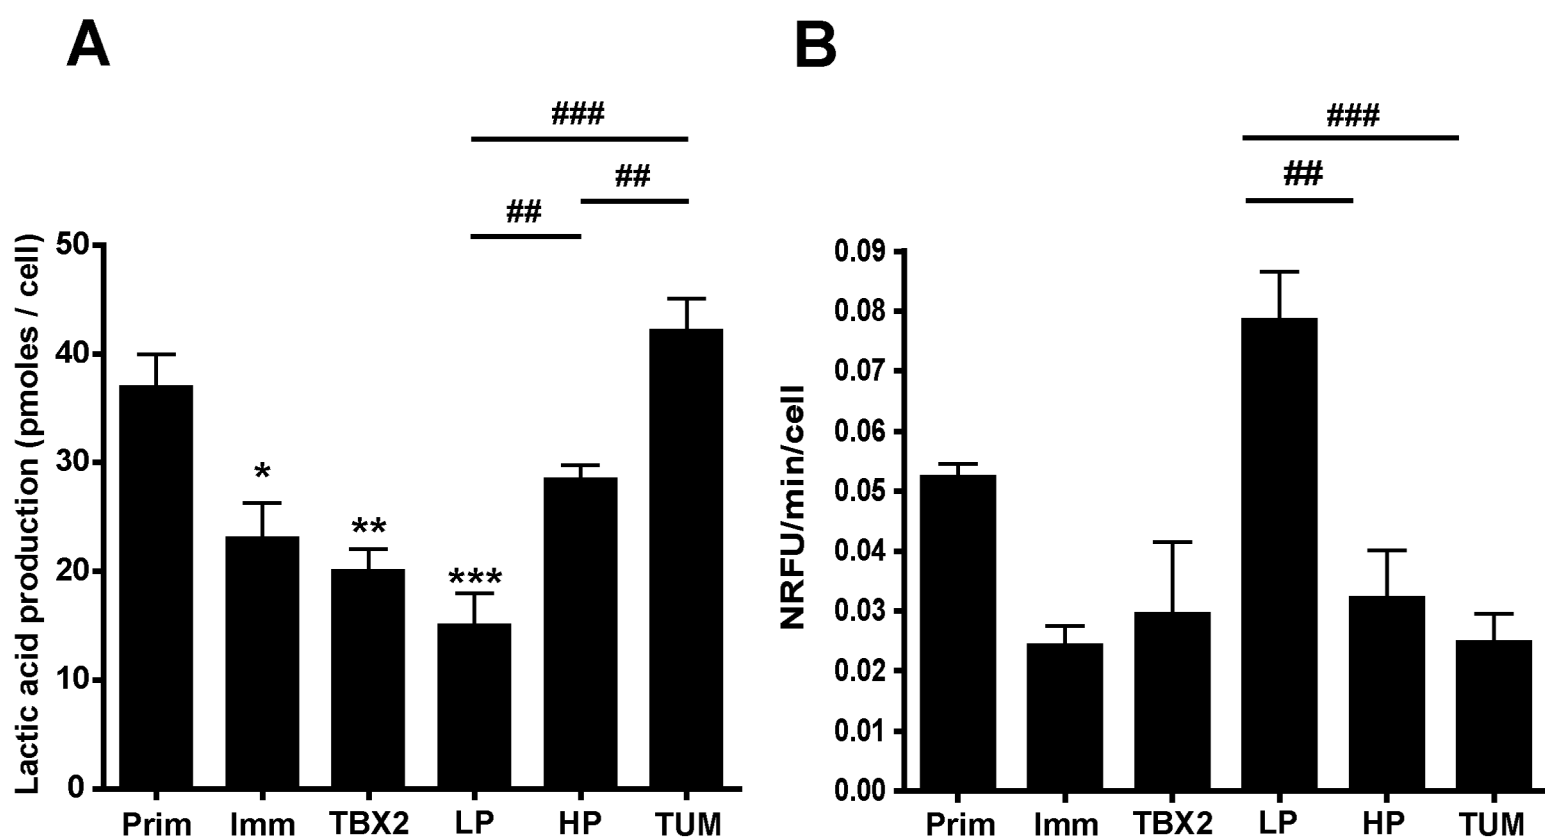

**Figure S4**

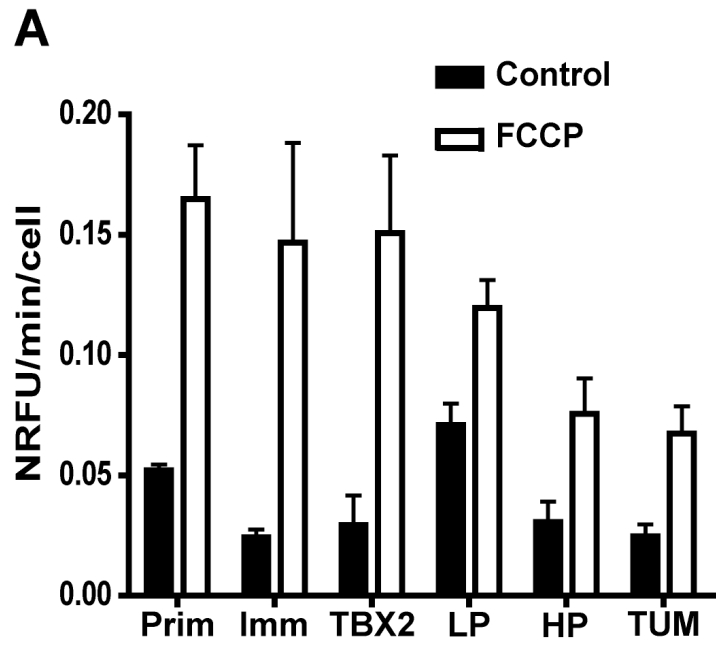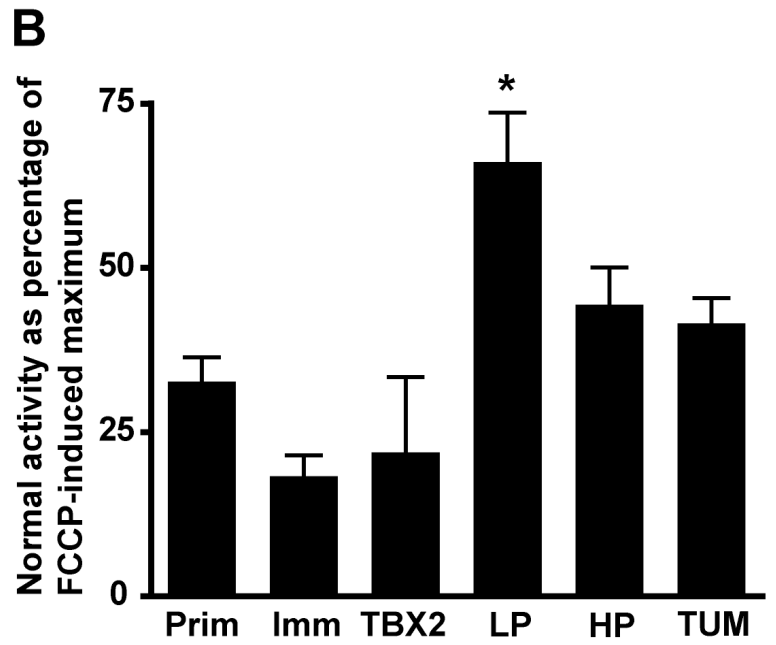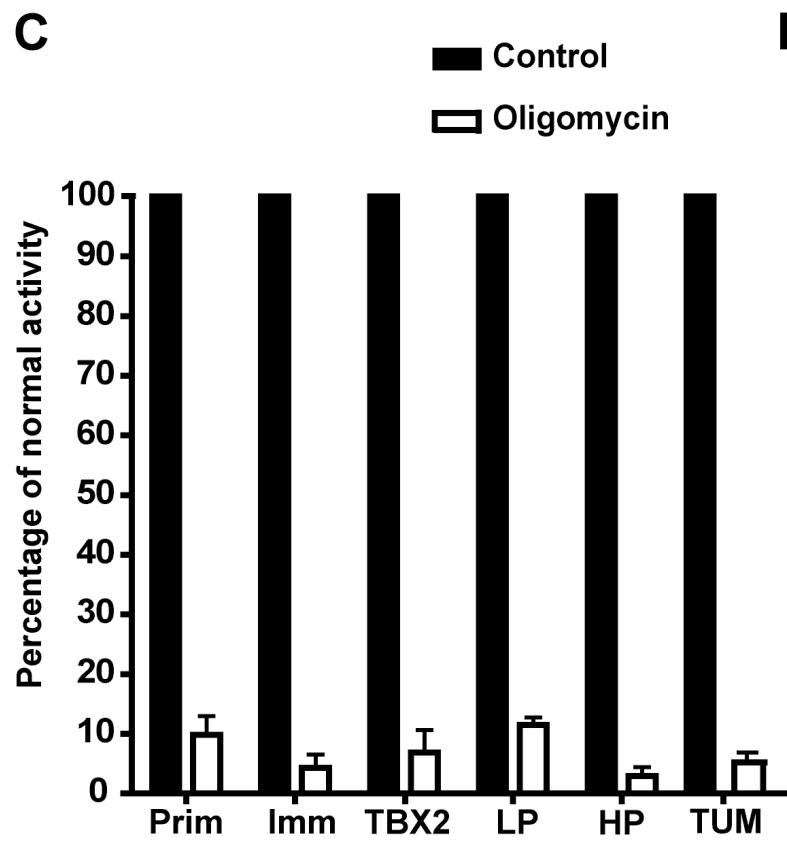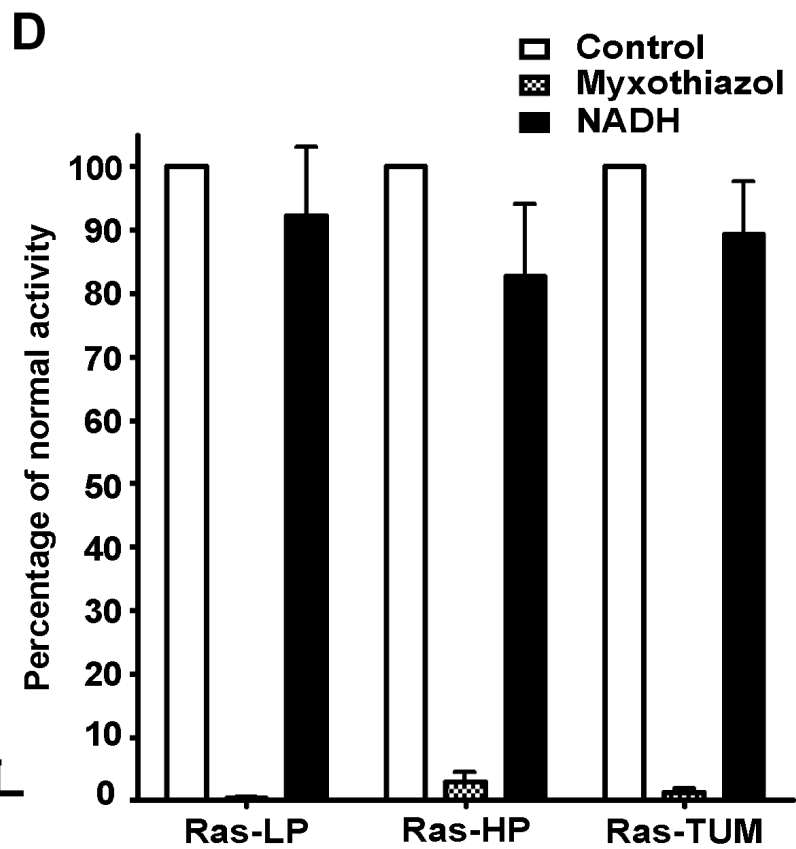

**Figure S5** (de Groof et al.)

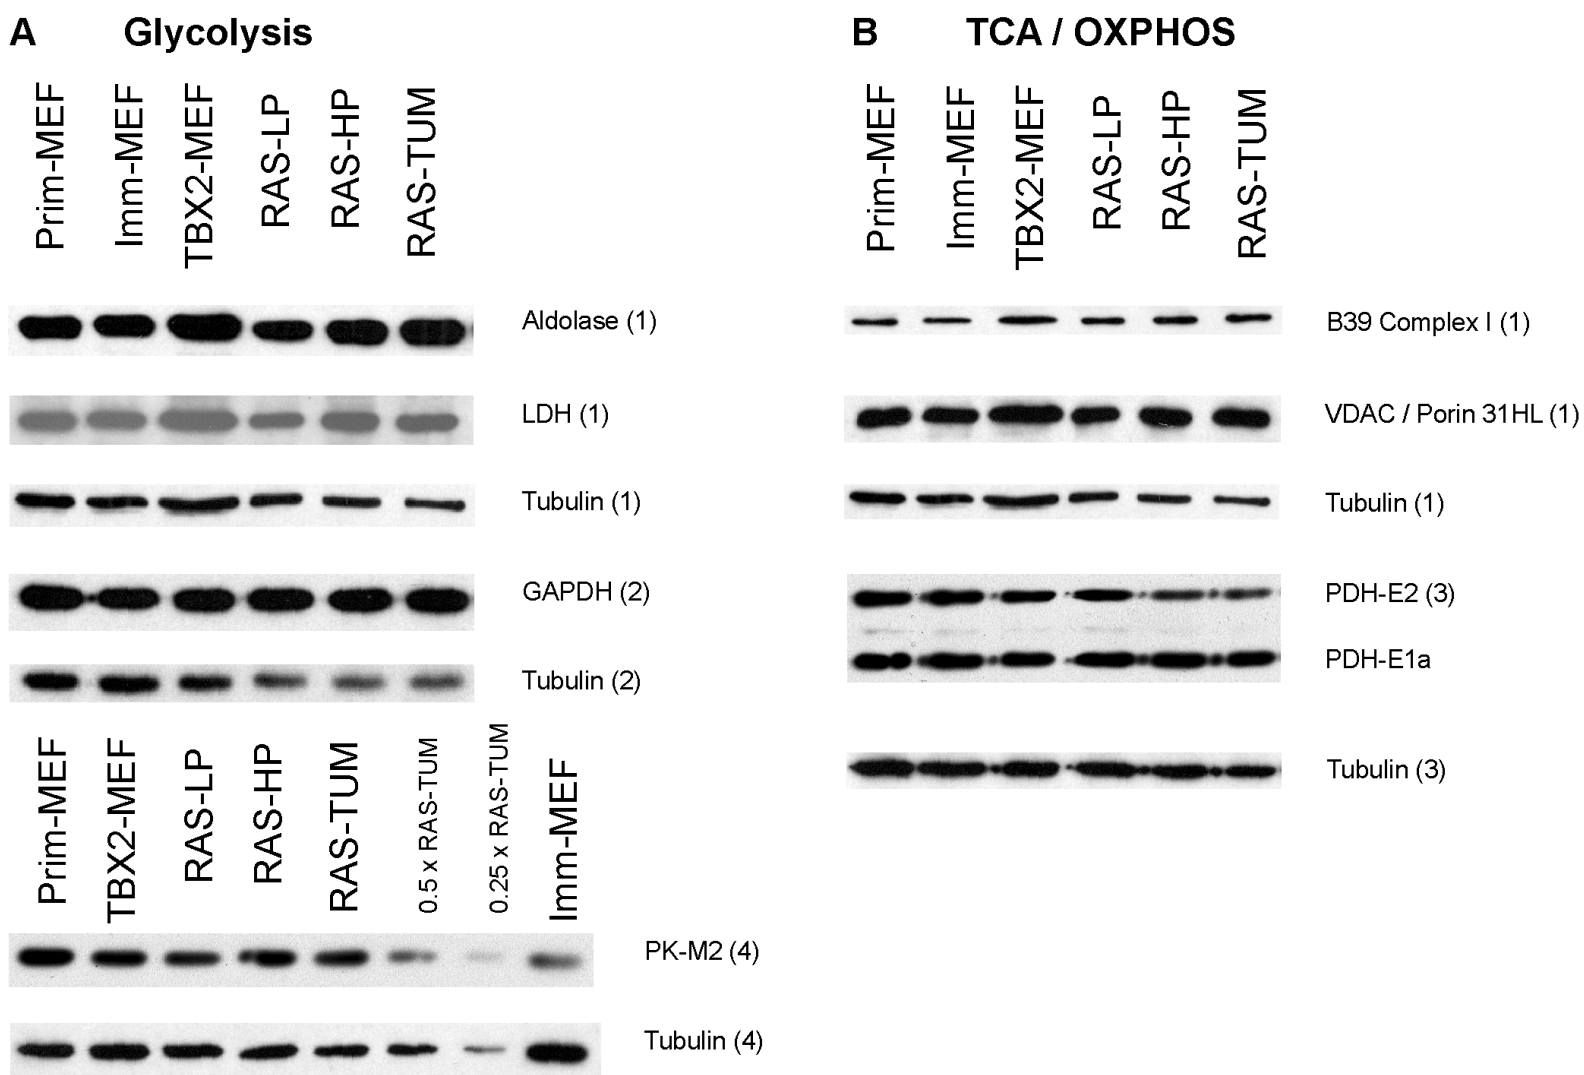

**C NAD synthesis, salvage & metabolism**

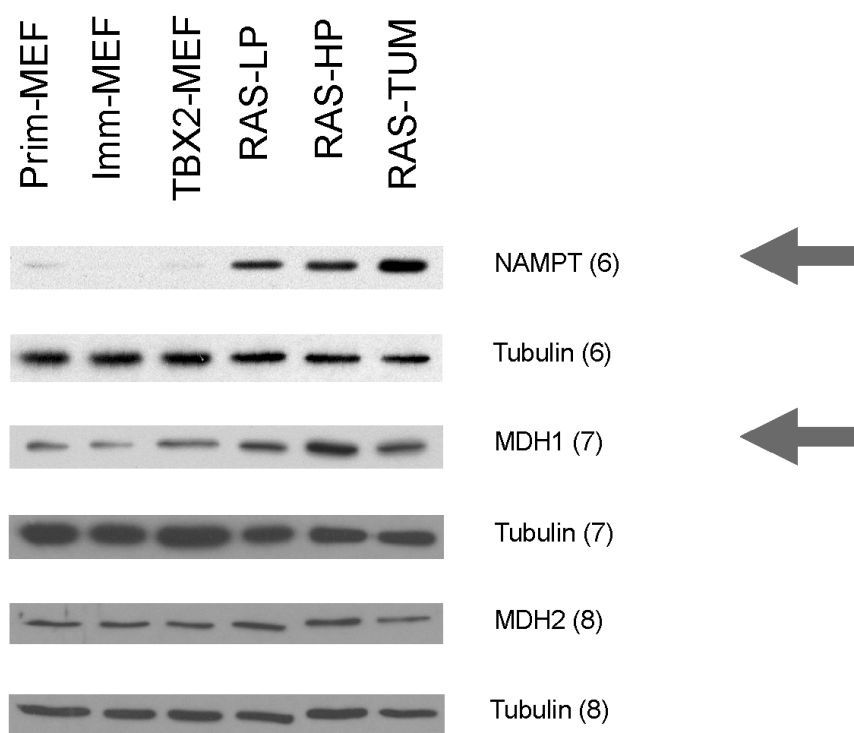

Figure S6

**A**

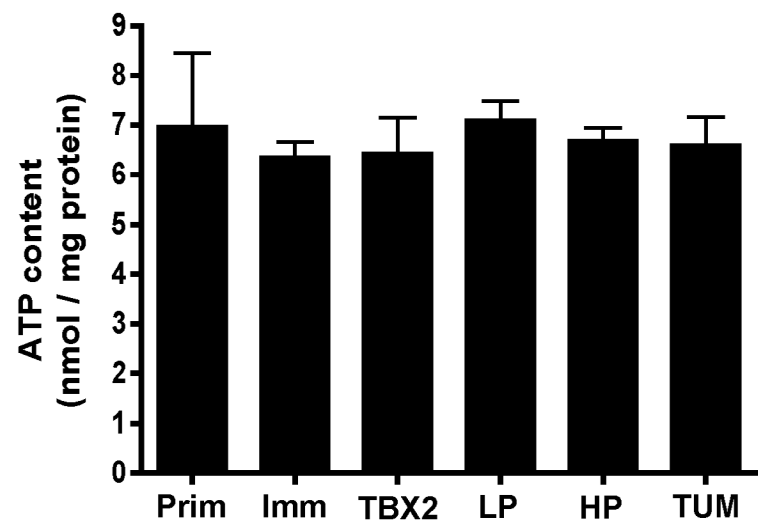

**B**

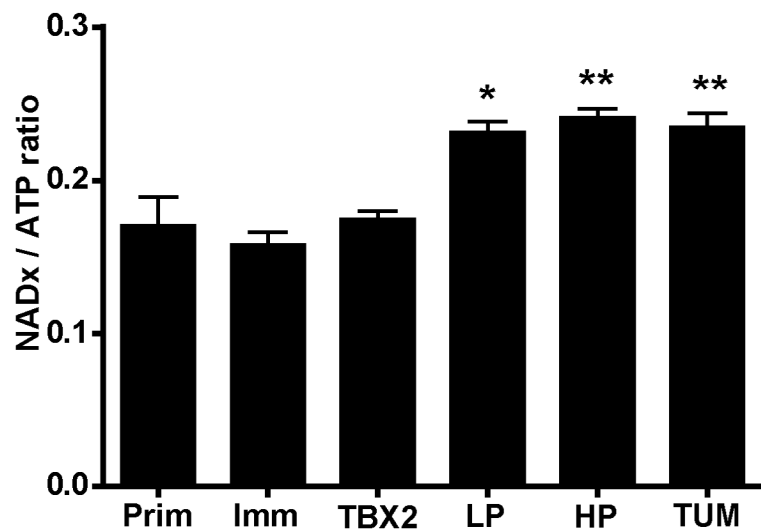

**C**

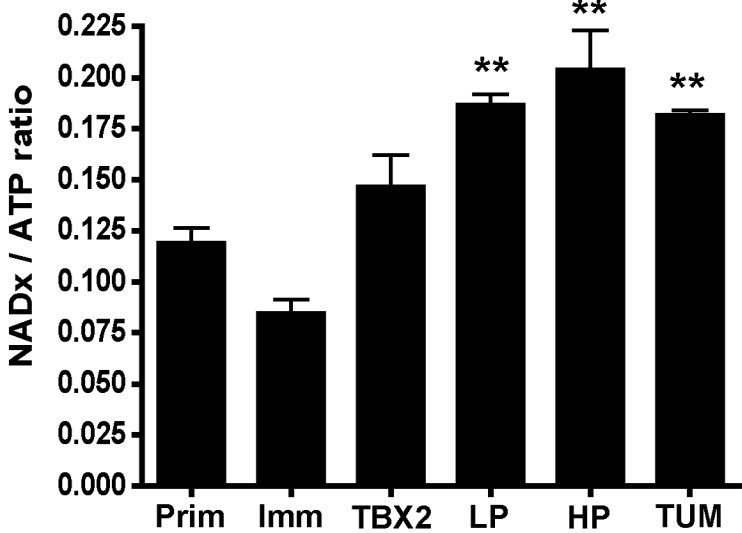

**D**

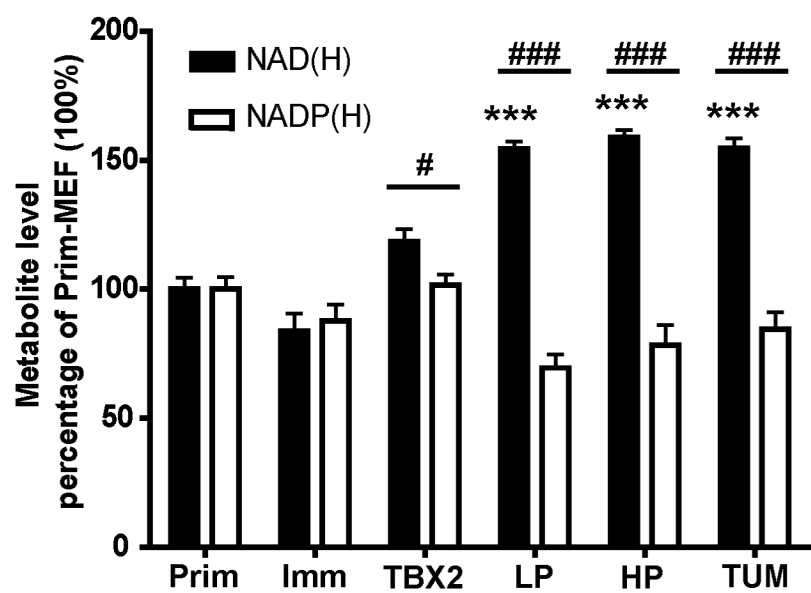

Figure S7

**A**

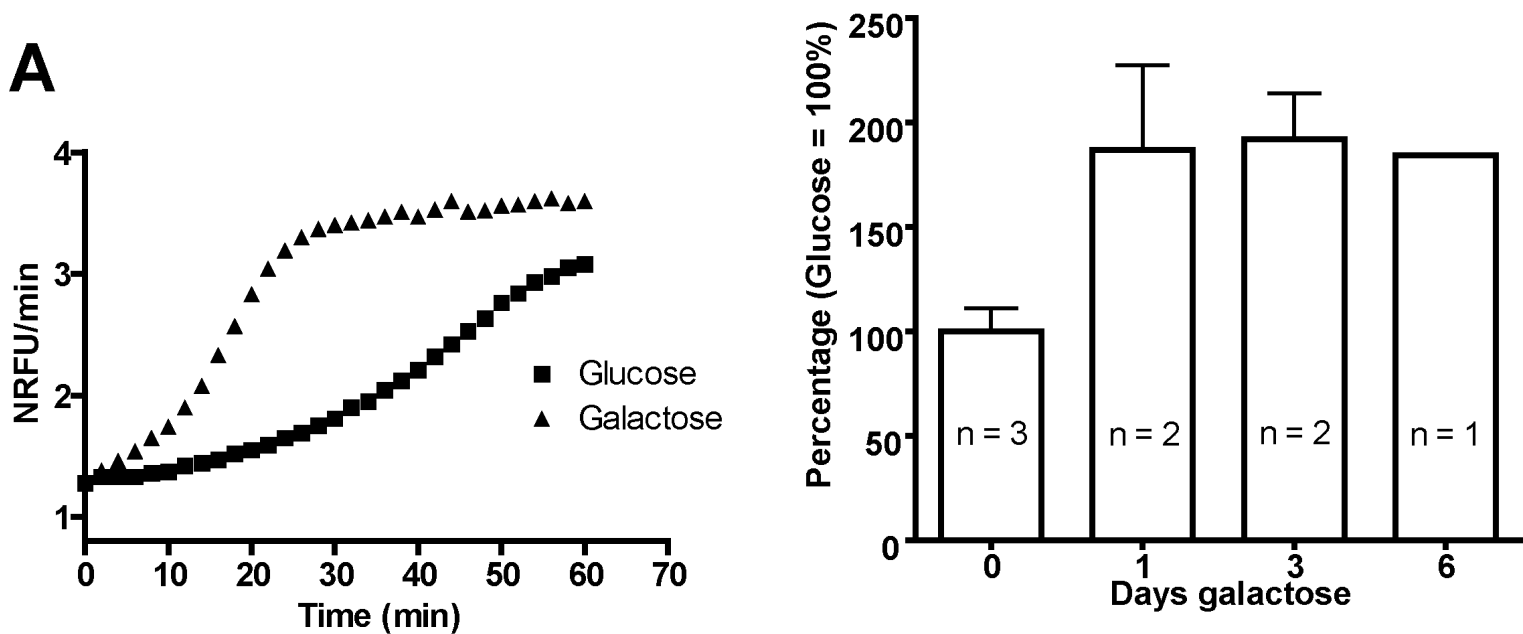

**B**

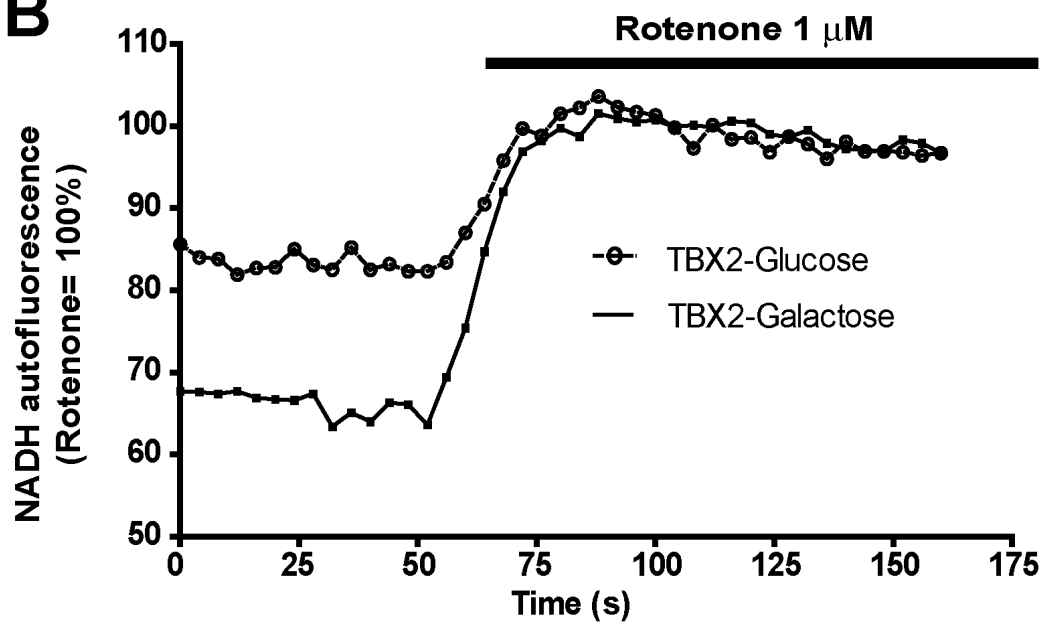

**C**

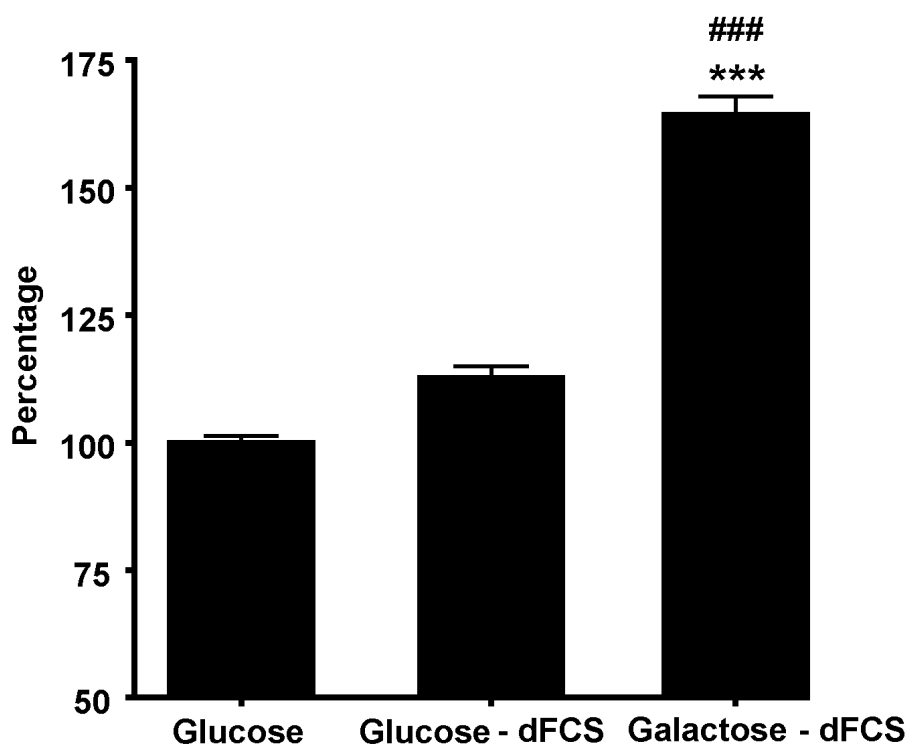

Supplement: 1476-4598-8-54-S1.pdf [file 1476-4598-8-54-S1.pdf]
